# Supplementary figures and images for: Clinical Manifestations and Mechanisms of Autoimmune Disease-Related Multiple Cerebral Infarcts
Source: PubMed Central journal article supplement — Cell Transplant. 2019 May 7;28(8):1045–52. doi: 10.1177/0963689719846838 (PMC6728708; doi:10.1177/0963689719846838), 2019-05-07

## Supplemental Figures

**Figure 1. Patient 1—ES on TCD**

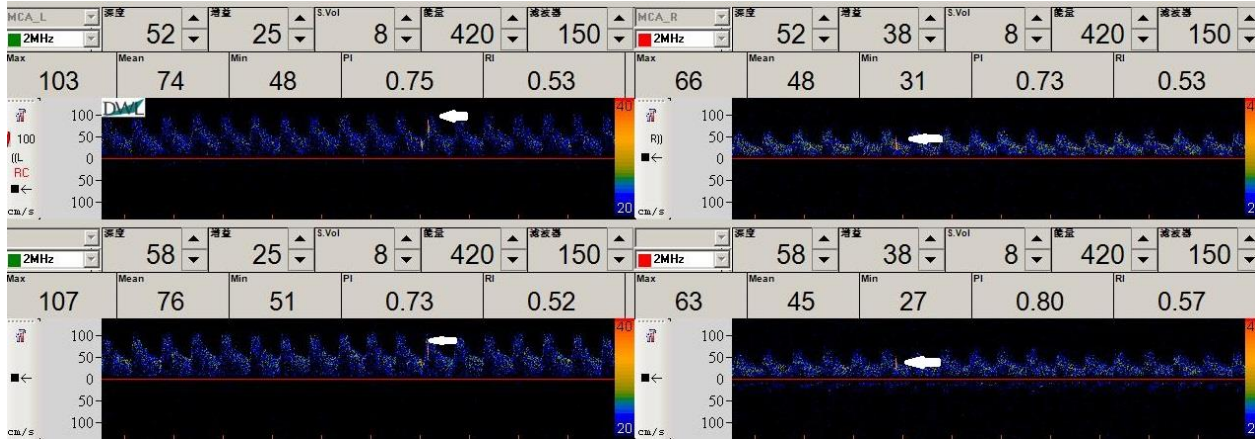

**Figure 2. Patient 2—ES on TCD**

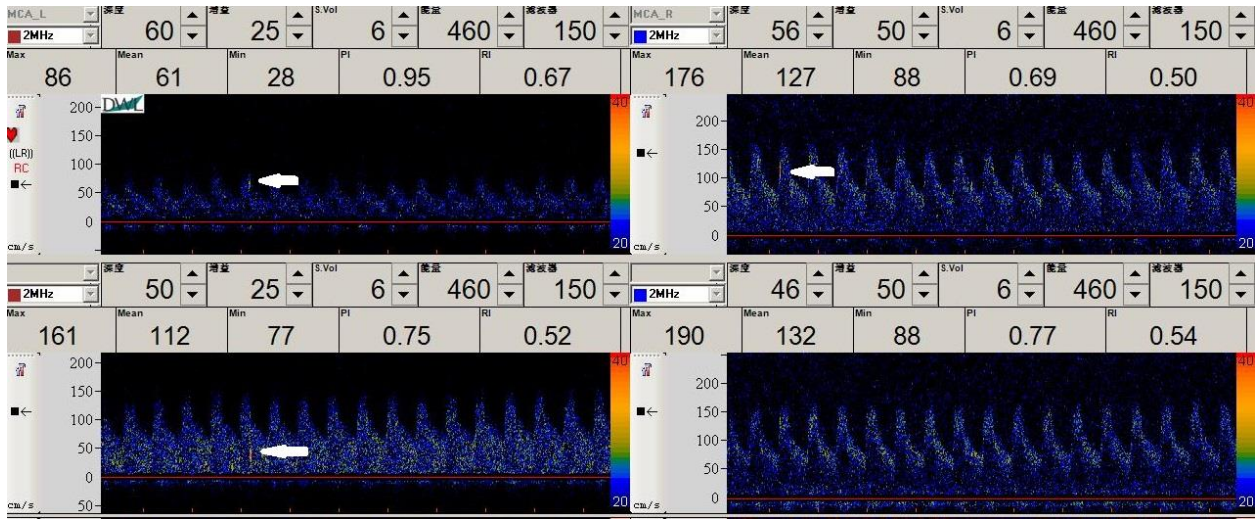

Supplement: Supplemental_Figures.pdf [file Supplemental_Figures.pdf]
